# Supplementary material for: Narrow-Margin Hepatectomy Resulted in Higher Recurrence and Lower Overall Survival for R0 Resection Hepatocellular Carcinoma
Source: PubMed Central journal article supplement (PMC7859433; doi:10.3389/fonc.2020.610636), 2021-01-21
Supplement: Image_1.pdf [file Image_1.pdf]

**(A) TACE(+/-) - Recurrence-free survival**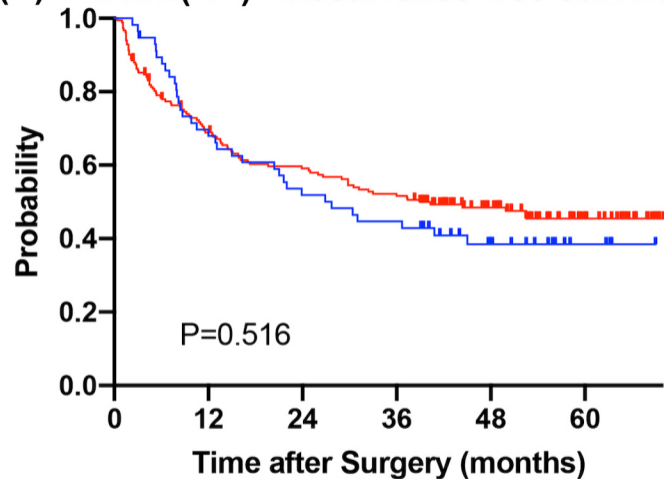**Number at risk**

|          |     |     |     |    |    |    |
|----------|-----|-----|-----|----|----|----|
| TACE (+) | 57  | 39  | 30  | 26 | 23 | 23 |
| TACE (-) | 183 | 127 | 110 | 97 | 92 | 89 |

**(B) TACE(+/-) - Overall Survival**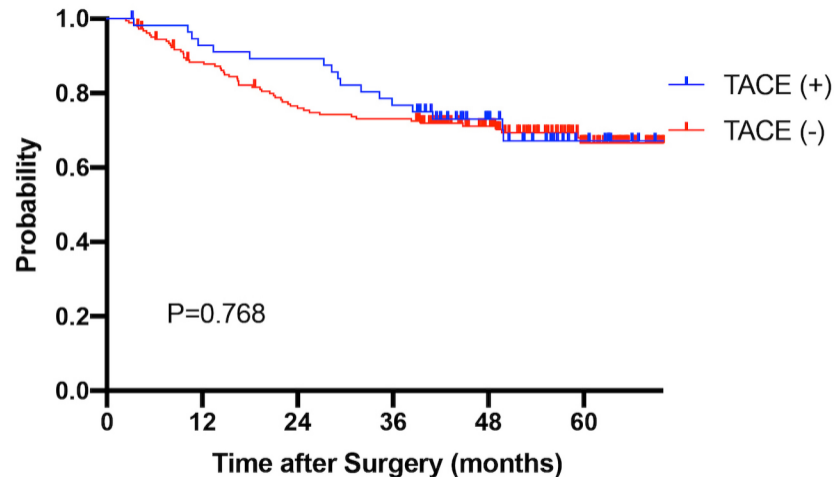**Number at risk**

|          |     |     |     |     |     |     |
|----------|-----|-----|-----|-----|-----|-----|
| TACE (+) | 57  | 53  | 51  | 44  | 42  | 40  |
| TACE (-) | 183 | 162 | 140 | 135 | 132 | 128 |
